# Supplementary material
Source: PubMed Central journal article supplement (PMC4915637)
Supplement: 10.3163.1536-5050.104.3.004.sg001.pdf [file 10.3163.1536-5050.104.3.004.sg001.pdf]

## **Instructional methods used by health sciences librarians to teach evidence-based practice (EBP): a systematic review**

*Stephanie M. Swanberg, MSI, AHIP; Carolyn Ching Dennison, MA, MLIS, AHIP; Alison Farrell, MLIS; Viola Machel, MLIS, BMSc; Christine Marton, PhD; Kelly K. O'Brien, MLIS; Virginia Pannabecker, MA, MA (IRLS), AHIP; Mindy Thuna, MSc, MIST; Assako Nitta Holyoke, MD, PhD, MSLIS*

### **APPENDIX A**

#### **Base PubMed search strategy used**

("Librarians"[MeSH] OR "Libraries"[MeSH] OR "information services"[MeSH] OR Information service\*[All Fields] OR "Information Science"[MeSH:noexp] OR information scien\*[all fields] OR "Information Dissemination"[MeSH] OR Library Science[MeSH] OR librar\*[All fields] OR information specialist\*[All Fields] OR informationist\*[All Fields] OR information professional\*[All Fields] OR information provider\*[All Fields]) AND ("Education"[MeSH] OR "education"[Subheading] OR teach\*[All Fields] OR facult\*[All Fields] OR educat\*[All Fields] OR train\*[All Fields] OR curricul\*[All Fields] OR "Learning"[MeSH] OR learn\*[All Fields] OR instruct\*[All Fields]) AND (Evidence-Based Practice[MeSH] OR "EBM" [All Fields] OR "EBP" [All Fields] OR "EBHC" [All Fields] OR "evidence based"[All Fields] OR "Information Literacy"[MeSH] OR information Litera\*[All Fields] OR information skill\*[ All Fields] OR Problem-Based Learning[MeSH] OR "problem based"[All Fields])

**Table A1**

Base search strategy broken into three key concepts

| <b>Key concept</b>      | <b>Search strategy</b>                                                                                                                                                                                                                                                                                                                                                                                                        |
|-------------------------|-------------------------------------------------------------------------------------------------------------------------------------------------------------------------------------------------------------------------------------------------------------------------------------------------------------------------------------------------------------------------------------------------------------------------------|
| Librarians              | ("Librarians"[MeSH] OR "Libraries"[MeSH] OR "information services"[MeSH] OR Information service*[All Fields] OR "Information Science"[MeSH:noexp] OR information scien*[all fields] OR "Information Dissemination"[MeSH] OR Library Science[MeSH] OR librar*[All fields] OR information specialist*[All Fields] OR informationist*[All Fields] OR information professional*[All Fields] OR information provider*[All Fields]) |
| Instructional methods   | ("Education"[MeSH] OR "education"[Subheading] OR teach*[All Fields] OR facult*[All Fields] OR educat*[All Fields] OR train*[All Fields] OR curricul*[All Fields] OR "Learning"[MeSH] OR learn*[All Fields] OR instruct*[All Fields])                                                                                                                                                                                          |
| Evidence-based practice | (Evidence-Based Practice[MeSH] OR "EBM" [All Fields] OR "EBP" [All Fields] OR "EBHC"[ All Fields] OR "evidence based"[All Fields] OR "Information Literacy"[MeSH] OR information Litera*[ All Fields] OR information skill*[ All Fields] OR Problem-Based Learning[MeSH] OR "problem based"[All Fields])                                                                                                                      |
