# Supplementary material
Source: PubMed Central journal article supplement (PMC4915637)
Supplement: 10.3163.1536-5050.104.3.004.sg002.pdf [file 10.3163.1536-5050.104.3.004.sg002.pdf]

## **Instructional methods used by health sciences librarians to teach evidence-based practice (EBP): a systematic review**

*Stephanie M. Swanberg, MSI, AHIP; Carolyn Ching Dennison, MA, MLIS, AHIP; Alison Farrell, MLIS; Viola Machel, MLIS, BMSc; Christine Marton, PhD; Kelly K. O'Brien, MLIS; Virginia Pannabecker, MA, MA (IRLS), AHIP; Mindy Thuna, MSc, MIST; Assako Nitta Holyoke, MD, PhD, MSLIS*

### **APPENDIX B**

#### **Data extraction elements modeled on the methodology described in Koufogiannakis and Wiebe [12]**

|                               |                                                                                                          |
|-------------------------------|----------------------------------------------------------------------------------------------------------|
| Item #                        | The numerical order of papers included in the project                                                    |
| Author(s)                     | Name of all authors on paper                                                                             |
| Publication date              | Date when the paper was published                                                                        |
| Institution/position          | The institution where the research took place, including country if other than United States             |
| Subject/field                 | Department or school or specialty of authors                                                             |
| Study objective               | The study objective stated by the authors                                                                |
| Participants/subject of study | The departmental and student levels (medicine, nursing, etc., students; or faculty, or residents, etc.)  |
| Study period                  | Duration of the research period                                                                          |
| Tie to student need           | Was the teaching tied to students' class assignment?                                                     |
| Contact time                  | How long was the instruction/class/session? How many times per year/semester?                            |
| Learning objectives           | Aims of teaching                                                                                         |
| Faculty collaboration         | Was the instruction based on a partnership with department/school faculty or solely librarian initiated? |
| Integrated or independent     | Was the instruction integrated as part of an existing course or was it an independent course or session? |
| Teaching method               | Way of presenting instructional materials or activities                                                  |
| Mode of class delivery        | How the instruction was carried out (lecture, small-group, computer lab, online, face-to-face, etc.)     |
| Research method               | Type of study design, research methodology                                                               |
| Learning outcomes             | How was the learning measured (tests, searching exercises, re-post format, survey)                       |
| Results/reported outcome      | Results of research, including numerical data; outcome as reported by the authors                        |
| Study limitations             | Any limitations stated by the authors                                                                    |
