# Supplementary material
Source: PubMed Central journal article supplement (PMC4915637)
Supplement: 10.3163.1536-5050.104.3.004.sg003.pdf [file 10.3163.1536-5050.104.3.004.sg003.pdf]

**Instructional methods used by health sciences librarians to teach evidence-based practice (EBP): a systematic review**

*Stephanie M. Swanberg, MSI, AHIP; Carolyn Ching Dennison, MA, MLIS, AHIP; Alison Farrell, MLIS; Viola Machel, MLIS, BMSc; Christine Marton, PhD; Kelly K. O'Brien, MLIS; Virginia Pannabecker, MA, MA (IRLS), AHIP; Mindy Thuna, MSc, MSt; Assako Nitta Holyoke, MD, PhD, MSLIS*

**Table 1**  
 Summary of 27 included studies

| Ref. no. | Subject area | Librarian role                                                                          | Instructional method                | Instructional time                                                                           | EBP skills addressed in instruction* |         |          |       |        | Study design                                                       | Sample size                            | Assessments |                |            | Outcome significance§                         |
|----------|--------------|-----------------------------------------------------------------------------------------|-------------------------------------|----------------------------------------------------------------------------------------------|--------------------------------------|---------|----------|-------|--------|--------------------------------------------------------------------|----------------------------------------|-------------|----------------|------------|-----------------------------------------------|
|          |              |                                                                                         |                                     |                                                                                              | Ask                                  | Acquire | Appraise | Apply | Assess |                                                                    |                                        | Skills      | Self-reported† | Validated‡ |                                               |
| 14       | Medical      | Curriculum, teaching, assessment, author, library and information science (LIS) faculty | Lecture, small group/1-on-1, online | 1.5-hour session (intervention: online learning module, control: traditional instructor-led) |                                      | ✓       |          |       |        | Randomized controlled trial (blinded); pre-, post                  | 128:<br>Intervention 65<br>Control 63  | ✓           | ✓              |            | Trend toward significance                     |
| 15       | Medical      | Curriculum, teaching, assessment, author                                                | Lecture, computer lab               | 1 3-hour workshop                                                                            | ✓                                    | ✓       |          |       |        | Program evaluation; pre-, post (no control group or randomization) | 42<br>~7 students per workshop session | ✓           |                |            | Minimum significance                          |
| 16       | Medical      | Curriculum, teaching, assessment, author                                                | Small group/1-on-1                  | Individual sessions, length not specified                                                    | ✓                                    | ✓       |          |       |        | Randomized controlled trial (blinded); pre-, post                  | 10<br>Intervention 5<br>Control 5      | ✓           | ✓              |            | No statistically significant results reported |

| Ref. no. | Subject area | Librarian role                           | Instructional method                      | Instructional time                                                                   | EBP skills addressed in instruction* |         |          |       |        | Study design                                                            | Sample size                           | Assessments |                |              | Outcome significance§                         |
|----------|--------------|------------------------------------------|-------------------------------------------|--------------------------------------------------------------------------------------|--------------------------------------|---------|----------|-------|--------|-------------------------------------------------------------------------|---------------------------------------|-------------|----------------|--------------|-----------------------------------------------|
|          |              |                                          |                                           |                                                                                      | Ask                                  | Acquire | Appraise | Apply | Assess |                                                                         |                                       | Skills      | Self-reported† | Validated‡   |                                               |
| 17       | Medical      | Curriculum, teaching, assessment, author | Lecture                                   | 8 1-hour weekly evidence-based medicine (EBM) seminars (internal medicine clerkship) | ✓                                    | ✓       | ✓        | ✓     |        | Course evaluation study; pre-, post (no control group or randomization) | 41                                    | ✓           | ✓              |              | High, good, and minimum significance          |
| 18       | Medical      | Curriculum, teaching, assessment, author | Lecture, small group/1-on-1               | 6 2-hour sessions (credit-bearing elective course)                                   | ✓                                    | ✓       | ✓        | ✓     | ✓      | Course evaluation study; pre-, post (no control group or randomization) | 30                                    | ✓           | ✓              | ✓<br>B       | High and good significance                    |
| 19       | Medical      | Teaching, author, assessment             | Lecture, computer lab                     | 1 2-hour workshop                                                                    | ✓                                    | ✓       |          |       |        | Randomized controlled trial (single-blinded)                            | 121:<br>Intervention 62<br>Control 59 | ✓           | ✓              | ✓<br>F<br>E* | Minimum significance                          |
| 20       | Medical      | Curriculum, teaching, assessment, author | Lecture, computer lab, small group/1-on-1 | 5 1.5-hour sessions (credit-bearing elective course)                                 | ✓                                    | ✓       | ✓        |       |        | Course evaluation study; pre-, post (no control group or randomization) | 51                                    | ✓           | ✓              |              | No statistically significant results reported |
| 21       | Medical      | Teaching, assessment, author             | Lecture, computer lab, peer assessment    | 2 sessions with 3rd session for formative test (length not specified)                |                                      | ✓       |          |       |        | Randomized controlled trial                                             | 71:<br>Intervention 47<br>Control 24  | ✓           |                |              | Trend toward significance                     |

| Ref. no. | Subject area        | Librarian role                           | Instructional method                      | Instructional time                                                                                 | EBP skills addressed in instruction* |         |          |       |        | Study design                                                             | Sample size                                               | Assessments |                |            | Outcome significance§                         |
|----------|---------------------|------------------------------------------|-------------------------------------------|----------------------------------------------------------------------------------------------------|--------------------------------------|---------|----------|-------|--------|--------------------------------------------------------------------------|-----------------------------------------------------------|-------------|----------------|------------|-----------------------------------------------|
|          |                     |                                          |                                           |                                                                                                    | Ask                                  | Acquire | Appraise | Apply | Assess |                                                                          |                                                           | Skills      | Self-reported† | Validated‡ |                                               |
| 22       | Medical             | Curriculum, teaching, assessment, author | Lecture, computer lab, small group/1-on-1 | 1 1.5-hour workshop                                                                                | ✓                                    | ✓       | ✓        | ✓     |        | Program evaluation; pre-, post (no control group or randomization)       | 150                                                       | ✓           |                |            | No statistically significant results reported |
| 23       | Medical             | Curriculum, teaching, assessment, author | Lecture                                   | 1 1.5-hour session (review session)                                                                | ✓                                    | ✓       |          |       |        | Program evaluation (no control group or randomization)                   | 177                                                       | ✓           | ✓              |            | No statistically significant results reported |
| 24       | Physician Assistant | Curriculum, teaching, assessment, author | Online                                    | Video tutorials 7–27 minutes long; accompanying materials (part of a credit-bearing online course) | ✓                                    | ✓       |          |       |        | Course evaluation study over 3 years (no control group or randomization) | 150                                                       | ✓           |                |            | No statistically significant results reported |
| 25       | Medical             | Curriculum, teaching, assessment, author | Lecture, computer lab, small group/1-on-1 | 3 sessions (credit-bearing required course)                                                        | ✓                                    | ✓       | ✓        |       |        | Course evaluation study; pre-, post (no control or randomization)        | 319                                                       | ✓           |                |            | High significance                             |
| 26       | Medical/Dental      | Curriculum, teaching, assessment, author | Lecture, computer lab, small group/1-on-1 | 6 4-hour problem-based learning (PBL) sessions                                                     | ✓                                    | ✓       |          |       |        | Randomized (group level) controlled study; pre-, post                    | 164: 18 PBL groups divided into Intervention 6 Control 12 | ✓           | ✓              |            | High and good significance                    |

| Ref. no. | Subject area                                     | Librarian role                           | Instructional method                | Instructional time                                                                                      | EBP skills addressed in instruction* |         |          |       |        | Study design                                                       | Sample size                  | Assessments |                |            | Outcome significance§                         |
|----------|--------------------------------------------------|------------------------------------------|-------------------------------------|---------------------------------------------------------------------------------------------------------|--------------------------------------|---------|----------|-------|--------|--------------------------------------------------------------------|------------------------------|-------------|----------------|------------|-----------------------------------------------|
|          |                                                  |                                          |                                     |                                                                                                         | Ask                                  | Acquire | Appraise | Apply | Assess |                                                                    |                              | Skills      | Self-reported† | Validated‡ |                                               |
| 27       | Graduate Health Program                          | Curriculum, teaching, assessment, author | Lecture, small group/1-on-1, online | 2 3-hour sessions, 1 online text-based tutorial (1–2 hours to complete) (part of credit-bearing course) | ✓                                    | ✓       |          |       |        | Program evaluation; pre-, post (no control group or randomization) | 13                           | ✓           | ✓              |            | High, good, and minimum significance          |
| 28       | Physical Therapy (PT)/ Occupational Therapy (OT) | Curriculum, teaching, assessment, author | Lecture, computer lab               | 2 1.5-hour workshops (part of credit-bearing required course)                                           | ✓                                    | ✓       |          |       |        | Program evaluation (no control group or randomization)             | 104                          | ✓           |                |            | No statistically significant results reported |
| 29       | Medical                                          | Teaching, assessment                     | Computer lab                        | 2 day, 6 hours each day EBM refresher for all; 1 30–90-minute session with intervention group           | ✓                                    | ✓       | ✓        |       |        | Randomized controlled trial                                        | 18: Intervention 9 Control 9 | ✓           |                | ✓<br>F*    | High and good significance                    |
| 30       | Medical                                          | Curriculum, teaching, assessment, author | Small group/1-on-1, online          | 2 online modules; small-group follow up sessions (length not specified)                                 | ✓                                    | ✓       |          | ✓     |        | Course evaluation study (no control group or randomization)        | Not reported                 | ✓           |                |            | No statistically significant results reported |
| 31       | Medical                                          | Curriculum, teaching, author             | Lecture, small group/1-on-1         | 3 or 4 weekly 2-hour seminars                                                                           | ✓                                    | ✓       | ✓        |       |        | Program evaluation; pre-, post (no control group or randomization) | 69                           | ✓           |                | ✓<br>F*    | High, good, and minimum significance          |

| Ref. no. | Subject area | Librarian role                           | Instructional method                | Instructional time                                                                                                                   | EBP skills addressed in instruction* |         |          |       |        | Study design                                           | Sample size                      | Assessments |                |            | Outcome significance§                |
|----------|--------------|------------------------------------------|-------------------------------------|--------------------------------------------------------------------------------------------------------------------------------------|--------------------------------------|---------|----------|-------|--------|--------------------------------------------------------|----------------------------------|-------------|----------------|------------|--------------------------------------|
|          |              |                                          |                                     |                                                                                                                                      | Ask                                  | Acquire | Appraise | Apply | Assess |                                                        |                                  | Skills      | Self-reported† | Validated‡ |                                      |
| 32       | Medical      | Teaching                                 | Computer lab                        | 1 4-hour workshop                                                                                                                    | ✓                                    | ✓       | ✓        | ✓     |        | Randomized controlled trial; pre-, post                | 48: Intervention 23, Control 25) | ✓           | ✓              |            | High, good, and minimum significance |
| 33       | Medical      | Curriculum, teaching, assessment, author | Lecture, small group/1-on-1         | 1 1-hour session; weekly 30-minute sessions for each 6–8 week rotation                                                               | ✓                                    | ✓       |          | ✓     |        | Randomized controlled trial (blinded)                  | 48 Intervention 24 Control 24    | ✓<br>**     | ✓              |            | High and good significance           |
| 34       | Medical      | Curriculum, teaching, assessment, author | Lecture, small group/1-on-1, online | 2 1-hour lectures; 3 2-hour small-group sessions; supplemental self-directed online learning website (1-month credit bearing course) | ✓                                    | ✓       | ✓        | ✓     |        | Program evaluation (no control group or randomization) | 139                              | ✓           | ✓              |            | High and minimum significance        |
| 35       | Medical      | Curriculum, teaching, assessment, author | Computer lab, small group/ 1-on-1   | 6 tutorial sessions (intervention) medical conference (control) (length not specified)                                               | ✓                                    | ✓       |          | ✓     |        | Randomized controlled trial                            | 77: Intervention 40 Control 37   | ✓           | ✓              |            | High, good, and minimum significance |

| Ref. no. | Subject area | Librarian role                                        | Instructional method                      | Instructional time                                                                                                                  | EBP skills addressed in instruction* |         |          |       |        | Study design                                           | Sample size                             | Assessments |                |            | Outcome significance§                         |
|----------|--------------|-------------------------------------------------------|-------------------------------------------|-------------------------------------------------------------------------------------------------------------------------------------|--------------------------------------|---------|----------|-------|--------|--------------------------------------------------------|-----------------------------------------|-------------|----------------|------------|-----------------------------------------------|
|          |              |                                                       |                                           |                                                                                                                                     | Ask                                  | Acquire | Appraise | Apply | Assess |                                                        |                                         | Skills      | Self-reported† | Validated‡ |                                               |
| 36       | Medical      | Curriculum, teaching, assessment, author              | Lecture, computer lab, small group/1-on-1 | Instruction sessions; individual and small-group work; and group presentations throughout 4-year medical school curriculum          | ✓                                    | ✓       | ✓        | ✓     |        | Program evaluation (no control group or randomization) | 256                                     | ✓           |                |            | No statistically significant results reported |
| 37       | Medical      | Curriculum, teaching, assessment, author              | Lecture, computer lab                     | 1 2-hour session (optional supplement to elective course)                                                                           | ✓                                    | ✓       |          |       |        | Nonrandomized controlled study; pre-, post             | 92:<br>Intervention 34<br>Control 58    | ✓           |                |            | Minimum significance                          |
| 38       | Medical      | Curriculum, teaching, assessment, author, LIS faculty | Online                                    | Online EBM curriculum (supplement to standard family medicine clerkship for intervention group) estimated 40–60 minutes to complete |                                      | ✓       | ✓        | ✓     |        | Randomized controlled trial (blinded)                  | 238:<br>Intervention 134<br>Control 104 | ✓           | ✓              |            | High, good, and minimum significance          |

| Ref. no. | Subject area                                                          | Librarian role                                    | Instructional method                               | Instructional time                                                                                                                     | EBP skills addressed in instruction* |         |          |       |        | Study design                                                                                           | Sample size                                                     | Assessments |                |            | Outcome significance§                               |
|----------|-----------------------------------------------------------------------|---------------------------------------------------|----------------------------------------------------|----------------------------------------------------------------------------------------------------------------------------------------|--------------------------------------|---------|----------|-------|--------|--------------------------------------------------------------------------------------------------------|-----------------------------------------------------------------|-------------|----------------|------------|-----------------------------------------------------|
|          |                                                                       |                                                   |                                                    |                                                                                                                                        | Ask                                  | Acquire | Appraise | Apply | Assess |                                                                                                        |                                                                 | Skills      | Self-reported† | Validated‡ |                                                     |
| 39       | PT/OT/<br>Respiratory<br>Therapy (RT)<br>/Physician<br>Assistant (PA) | Curriculum,<br>teaching,<br>assessment,<br>author | Lecture,<br>computer lab,<br>small<br>group/1-on-1 | 7 weekly 3-hour<br>sessions<br>(credit-bearing<br>required course)                                                                     |                                      | ✓       | ✓        | ✓     |        | Nonrandomized<br>controlled study;<br>pre-, post                                                       | 253:<br>Intervention<br>189<br>(PT/OT/RT)<br>Control (PA)<br>64 | ✓           | ✓              |            | High and good<br>significance                       |
| 40       | Nursing                                                               | Curriculum,<br>teaching,<br>assessment,<br>author | Lecture,<br>computer lab                           | 4 sessions<br>totalling 4.5<br>hours over 3<br>semesters (group<br>A), 2 sessions<br>totalling 2 hours<br>over 1 semester<br>(group B) |                                      | ✓       |          |       |        | Prospective cohort<br>study, pre-, post;<br>control and<br>intervention<br>groups, no<br>randomization | 90<br>Intervention 60<br>Control 30                             | ✓           |                |            | No statistically<br>significant<br>results reported |

\* EBP skills addressed in instruction: **Ask**: population, intervention, comparison, outcomes (PICO) question format or clinical question development; **Acquire**: search strategy development, searching techniques, information sources, study selection, acquiring full-text using institutionally specific or other services and options like full-text linkers and interlibrary loan; **Appraise**: critical appraisal of evidence (studies selected) for any one or more of the following: study design, level of evidence based on hierarchy of evidence, statistics use and reporting, therapy/diagnosis/other question-type specific indicators such as likelihood ratios, number needed to treat, absolute risk reductions, etc., evaluation methods for qualitative and quantitative study designs, and for websites; **Apply**: application of evidence to clinical case, clinical scenario, or other case study; **Assess**: discussion or practice evaluating application of evidence to clinical case, clinical scenario, or other case study.

† Self-reported: Study includes a measure of participant self-reported attitude, confidence, or perceived change in skill level.

‡ Validated: Use of a validated assessment tool to measure EBP skills or for self-reported measures of attitude, confidence, or perceived change in skill level. Validated assessments used in studies in this systematic review include: **F**=Fresno test [42], **F\***=partial use of Fresno test, **B**=Berlin Questionnaire [41], **E\***=partial use of Evidence-Based Practice Questionnaire [43]

§ Outcome significance: As part of reviewing the included studies, each was rated regarding statistical significance of measured outcomes, using the following categories: **High significance**=adequate to strong study design,  $p < 0.001$  or less on at least 1 measure; **Good significance**=adequate or better study design with  $0.001 < p < 0.02$  on at least 1 measure; **Minimum significance**=adequate or better study design with  $0.02 < p \leq 0.05$  on at least 1 measure; **Trend toward significance** with  $0.05 < p < 0.1$  on at least 1 measure. **No statistically significant results** reported.

\*\* This study's skills assessment was unique in its use of library system web server log data to measure EBP skills performance related to searching as part of the evaluation of the post-intervention searching activity. Data collected included logons to Ovid MEDLINE, searching volume, abstract and full-text views, and total searching time.
